# Supplementary material for: Rapid assimilations of O 3 observations – Part 1: methodology and tropospheric O 3 changes in China in 2015–2020
Source: Copernicus journal article supplement (doi:10.5194/gmd-2023-35), 2023-04-04
Supplement: Supplementary file 1 [file gmd-2023-35-supplement.pdf]

## Supplemental Information

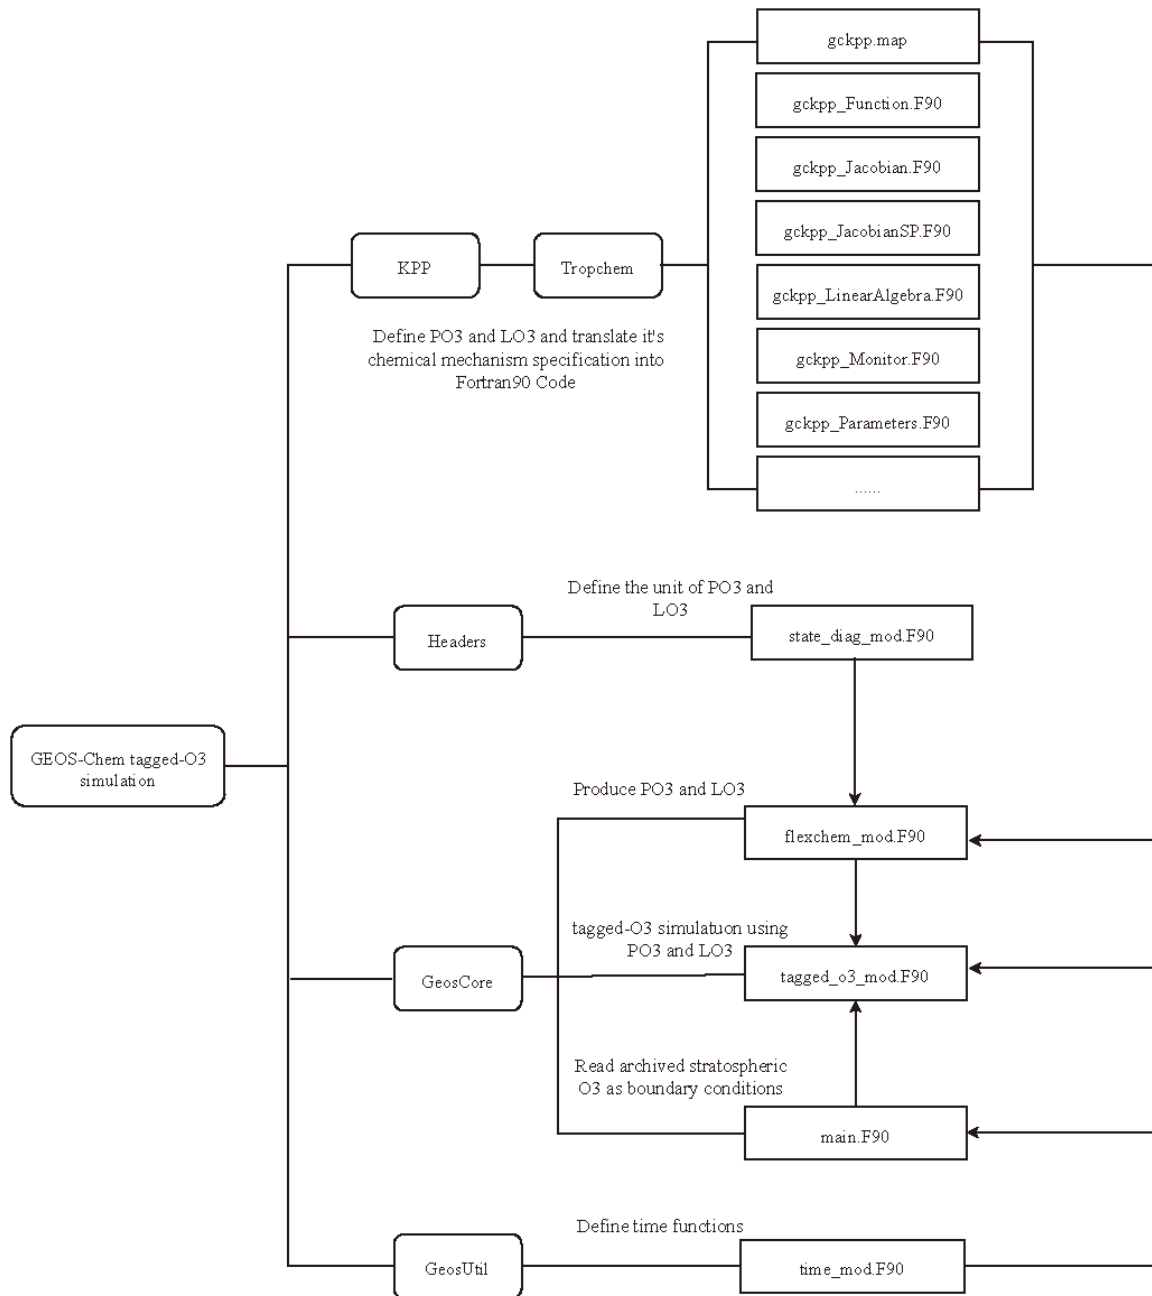

**Fig. S1.** Framework of the tagged-O<sub>3</sub> mode of GEOS-Chem.

## GEOS-Chem Surface MDA8 Ozone Concentration

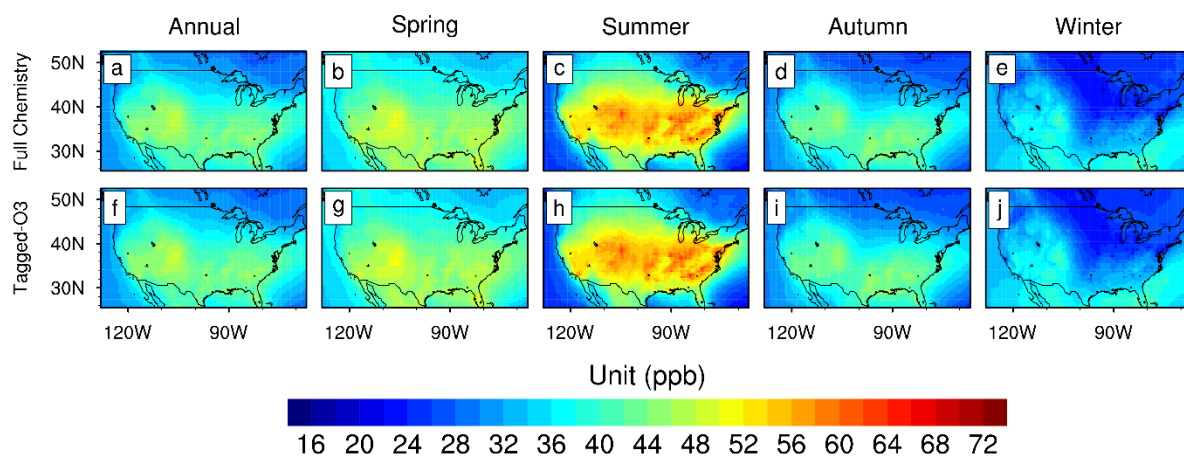

## GEOS-Chem Surface MDA8 Ozone Concentration

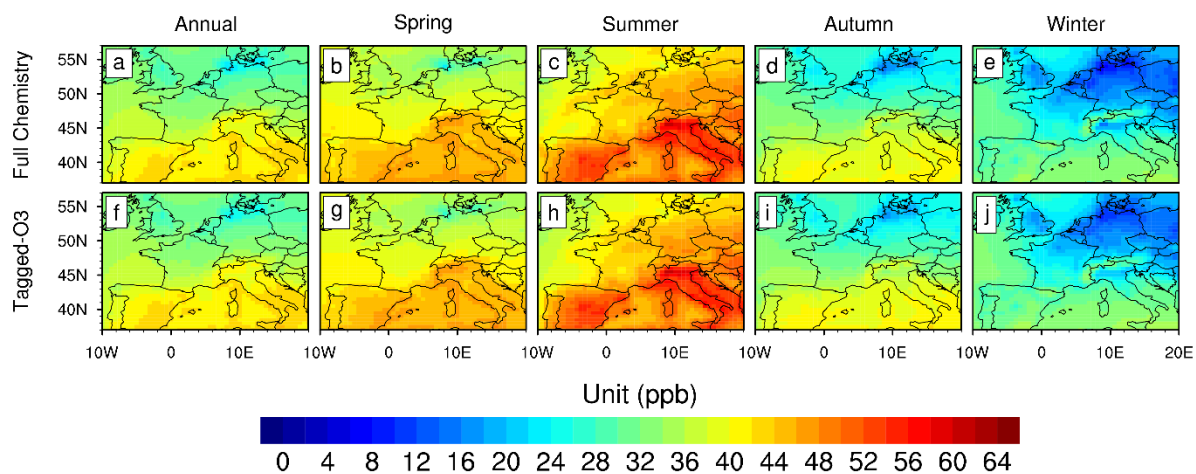

**Fig. S2.** Surface MDA8 O<sub>3</sub> in 2005-2020 (annual and seasonal averages) simulated by GEOS-Chem model with (A-E) full chemistry mode; (F-J) tagged-O<sub>3</sub> mode.

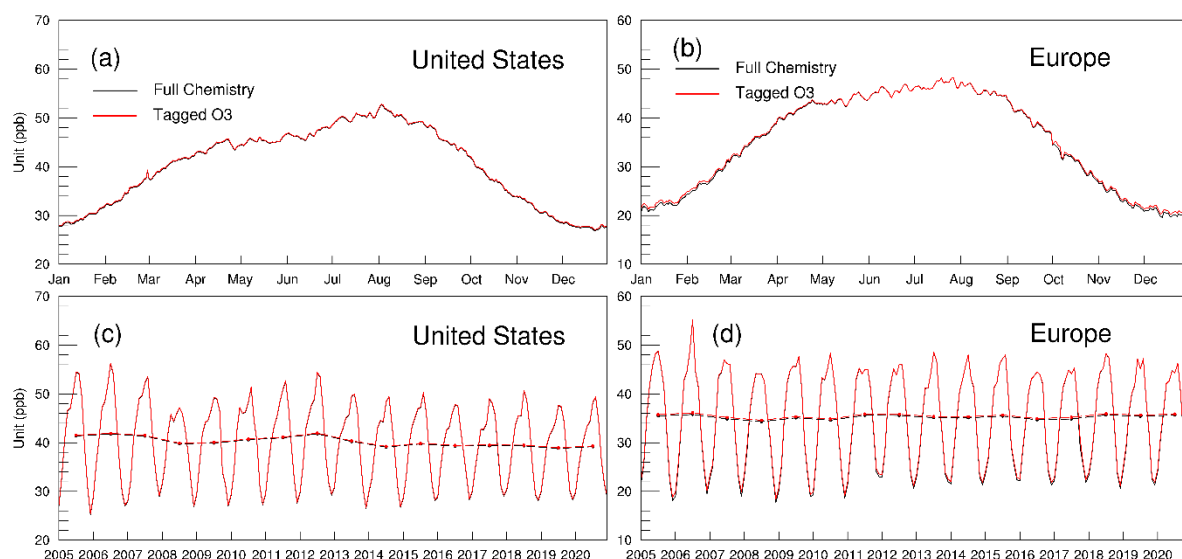

**Fig. S3.** (A-B) Daily averages of surface MDA8 O<sub>3</sub> over the US and Europe in 2005-2020 from GEOS-Chem full chemistry and tagged-O<sub>3</sub> simulations; (C-D) Monthly averages of MDA8 O<sub>3</sub>. The dashed lines in panels C-D are annual averages.

| #1 North China Plain<br>(2015-2020)  |          | Annual |       | Spring |       | Summer |       | Autumn |       | Winter |       |
|--------------------------------------|----------|--------|-------|--------|-------|--------|-------|--------|-------|--------|-------|
|                                      |          | Mean   | Trend |
| TS1.1 surface<br>(sampled)           | MEE      | 47.6   | 2.34  | 55.7   | 2.41  | 65.2   | 3.00  | 42.9   | 2.29  | 27.8   | 1.35  |
|                                      | a priori | 42.3   | 0.46  | 45.9   | 0.53  | 65.2   | 0.61  | 36.0   | 0.60  | 22.4   | 0.34  |
|                                      | KF-MEE   | 45.6   | 1.76  | 51.7   | 1.94  | 63.5   | 2.52  | 40.8   | 1.72  | 27.2   | 0.81  |
| TS1.2<br>surface                     | a priori | 42.5   | 0.46  | 46.1   | 0.51  | 66.0   | 0.62  | 35.9   | 0.59  | 22.5   | 0.34  |
|                                      | KF-MEE   | 44.8   | 1.56  | 50.5   | 1.70  | 64.1   | 2.33  | 39.3   | 1.53  | 25.9   | 0.76  |
| TS1.3<br>trop. column<br>(convolved) | OMI      | 45.2   | -0.48 | 46.6   | 0.08  | 59.1   | -1.12 | 42.7   | -0.69 | 32.0   | -0.69 |
|                                      | a priori | 40.9   | 0.04  | 41.5   | 0.20  | 53.7   | -0.32 | 38.3   | 0.21  | 30.0   | 0.00  |
|                                      | KF-OMI   | 42.7   | -0.20 | 43.3   | 0.08  | 57.0   | -0.72 | 40.0   | -0.16 | 30.3   | -0.13 |
| TS1.4<br>trop. Column                | a priori | 42.9   | 0.26  | 44.6   | -0.10 | 54.5   | 0.10  | 39.5   | 0.74  | 33.4   | 0.64  |
|                                      | KF-MEE   | 41.4   | 0.66  | 43.3   | 0.36  | 51.3   | 0.79  | 38.1   | 1.08  | 33.3   | 0.80  |
|                                      | KF-OMI   | 43.7   | 0.12  | 45.8   | -0.19 | 56.2   | -0.11 | 40.3   | 0.50  | 33.2   | 0.52  |

**Table. S1.** Averages (with units ppb or DU) and trends (with units ppb yr<sup>-1</sup> or DU yr<sup>-1</sup>) of surface and tropospheric column O<sub>3</sub> concentrations in 2015-2020 over North China Plain (Region #1) from observations (MEE and OMI) and a priori and a posteriori (KF) simulations. Grids with low and medium anthropogenic NO<sub>x</sub> emissions are excluded in North China Plain.

| #2 Yangtze River Delta<br>(2015-2020) |          | Annual |       | Spring |       | Summer |       | Autumn |       | Winter |       |
|---------------------------------------|----------|--------|-------|--------|-------|--------|-------|--------|-------|--------|-------|
|                                       |          | Mean   | Trend |
| TS2.1 surface<br>(sampled)            | MEE      | 44.9   | 2.01  | 52.3   | 2.84  | 55.6   | 1.84  | 44.6   | 2.65  | 28.1   | 0.53  |
|                                       | a priori | 44.5   | 0.63  | 49.1   | 0.88  | 60.5   | 0.58  | 42.5   | 0.92  | 26.3   | 0.37  |
|                                       | KF-MEE   | 45.0   | 1.38  | 50.7   | 2.21  | 56.2   | 1.34  | 44.6   | 1.84  | 28.9   | 0.13  |
| TS2.2<br>surface                      | a priori | 44.6   | 0.61  | 49.2   | 0.87  | 59.9   | 0.49  | 42.7   | 0.91  | 26.9   | 0.40  |
|                                       | KF-MEE   | 44.9   | 1.28  | 50.6   | 2.07  | 55.9   | 1.15  | 44.5   | 1.71  | 29.1   | 0.19  |
| TS2.3<br>trop. column<br>(convolved)  | OMI      | 48.6   | -0.29 | 55.0   | 0.15  | 53.6   | 0.23  | 45.0   | -1.08 | 40.2   | -1.03 |
|                                       | a priori | 45.4   | 0.38  | 53.4   | 0.45  | 48.5   | 0.51  | 40.4   | -0.22 | 39.3   | 0.34  |
|                                       | KF-OMI   | 47.0   | 0.10  | 53.9   | 0.27  | 51.9   | 0.33  | 43.1   | -0.71 | 38.8   | 0.02  |
| TS2.4<br>trop. Column                 | a priori | 47.9   | 0.28  | 56.4   | 0.28  | 45.4   | -0.04 | 41.1   | 0.59  | 49.1   | 0.63  |
|                                       | KF-MEE   | 46.0   | 0.60  | 54.2   | 0.74  | 42.4   | 0.41  | 39.6   | 0.84  | 48.6   | 0.78  |
|                                       | KF-OMI   | 48.1   | 0.13  | 56.0   | 0.15  | 46.7   | -0.16 | 42.3   | 0.29  | 48.1   | 0.48  |

**Table. S2.** Averages (with units ppb or DU) and trends (with units ppb yr<sup>-1</sup> or DU yr<sup>-1</sup>) of surface and tropospheric column O<sub>3</sub> concentrations in 2015-2020 over Yangtze River Delta (Region #2) from observations (MEE and OMI) and a priori and a posteriori (KF) simulations. Grids with low and medium anthropogenic NO<sub>x</sub> emissions are excluded in Yangtze River Delta.

| #3 Central China<br>(2015-2020)      |          | Annual |       | Spring |       | Summer |       | Autumn |       | Winter |       |
|--------------------------------------|----------|--------|-------|--------|-------|--------|-------|--------|-------|--------|-------|
|                                      |          | Mean   | Trend |
| TS3.1 surface<br>(sampled)           | MEE      | 43.5   | 1.90  | 48.8   | 2.53  | 52.6   | 1.89  | 45.4   | 2.54  | 28.0   | 0.52  |
|                                      | a priori | 44.7   | 0.37  | 50.0   | 0.53  | 59.1   | -0.10 | 44.0   | 0.78  | 26.4   | 0.49  |
|                                      | KF-MEE   | 43.1   | 1.55  | 47.8   | 2.07  | 53.0   | 1.51  | 44.7   | 2.09  | 27.8   | 0.47  |
| TS3.2<br>surface                     | a priori | 44.9   | 0.37  | 50.2   | 0.52  | 58.8   | -0.15 | 44.0   | 0.77  | 27.0   | 0.53  |
|                                      | KF-MEE   | 43.3   | 1.33  | 48.0   | 1.72  | 53.4   | 1.16  | 44.2   | 1.83  | 28.2   | 0.63  |
| TS3.3<br>trop. column<br>(convolved) | OMI      | 47.4   | -0.60 | 54.4   | -0.36 | 50.7   | -0.66 | 42.8   | -0.94 | 40.8   | -0.60 |
|                                      | a priori | 45.2   | -0.09 | 53.5   | 0.04  | 47.7   | -0.22 | 39.7   | 0.09  | 39.4   | -0.19 |
|                                      | KF-OMI   | 46.2   | -0.37 | 53.6   | -0.20 | 50.0   | -0.51 | 41.8   | -0.47 | 39.1   | -0.33 |
| TS3.4<br>trop. Column                | a priori | 48.1   | 0.09  | 56.7   | 0.32  | 45.8   | -0.37 | 40.9   | 0.35  | 49.3   | 0.12  |
|                                      | KF-MEE   | 45.9   | 0.46  | 54.2   | 0.79  | 42.7   | 0.13  | 38.8   | 0.67  | 48.5   | 0.33  |
|                                      | KF-OMI   | 48.1   | -0.06 | 55.7   | 0.15  | 47.0   | -0.51 | 42.1   | 0.06  | 48.2   | 0.00  |

**Table. S3.** Averages (with units ppb or DU) and trends (with units ppb yr<sup>-1</sup> or DU yr<sup>-1</sup>) of surface and tropospheric column O<sub>3</sub> concentrations in 2015-2020 over Central China (Region #3) from observations (MEE and OMI) and a priori and a posteriori (KF) simulations.

| #4 Sichuan Basin<br>(2015-2020)      |          | Annual |       | Spring |       | Summer |       | Autumn |       | Winter |       |
|--------------------------------------|----------|--------|-------|--------|-------|--------|-------|--------|-------|--------|-------|
|                                      |          | Mean   | Trend |
| TS4.1 surface<br>(sampled)           | MEE      | 36.9   | 1.13  | 45.1   | 2.27  | 50.7   | 0.95  | 29.2   | 0.50  | 23.4   | 0.59  |
|                                      | a priori | 45.3   | -0.26 | 51.1   | -0.02 | 59.1   | -1.01 | 41.7   | -0.17 | 29.5   | 0.30  |
|                                      | KF-MEE   | 37.5   | 0.77  | 44.4   | 1.69  | 50.3   | 0.54  | 31.7   | 0.32  | 24.5   | 0.45  |
| TS4.2<br>surface                     | a priori | 43.9   | -0.28 | 49.8   | -0.02 | 53.6   | -1.01 | 41.3   | -0.18 | 31.4   | 0.25  |
|                                      | KF-MEE   | 39.1   | 0.38  | 44.9   | 0.99  | 47.3   | -0.04 | 35.7   | 0.25  | 28.9   | 0.28  |
| TS4.3<br>trop. column<br>(convolved) | OMI      | 42.6   | -0.39 | 47.7   | 0.30  | 46.3   | -0.59 | 37.5   | -0.66 | 38.7   | -1.08 |
|                                      | a priori | 42.6   | 0.02  | 51.2   | 0.21  | 44.5   | -0.33 | 36.0   | 0.29  | 38.2   | -0.26 |
|                                      | KF-OMI   | 42.9   | -0.23 | 49.6   | 0.05  | 46.3   | -0.45 | 37.5   | -0.31 | 37.7   | -0.51 |
| TS4.4<br>trop. Column                | a priori | 44.8   | -0.14 | 53.4   | 0.23  | 42.4   | -0.71 | 36.6   | -0.08 | 47.3   | -0.16 |
|                                      | KF-MEE   | 42.6   | 0.17  | 51.1   | 0.59  | 39.4   | -0.25 | 34.3   | 0.18  | 46.2   | 0.02  |
|                                      | KF-OMI   | 44.6   | -0.29 | 51.6   | 0.04  | 43.4   | -0.89 | 37.8   | -0.33 | 46.0   | -0.23 |

**Table. S4.** Averages (with units ppb or DU) and trends (with units ppb yr<sup>-1</sup> or DU yr<sup>-1</sup>) of surface and tropospheric column O<sub>3</sub> concentrations in 2015-2020 over Sichuan Basin (Region #4) from observations (MEE and OMI) and a priori and a posteriori (KF) simulations.

| #5 Southern China<br>(2015-2020)     |          | Annual |       | Spring |       | Summer |       | Autumn |       | Winter |       |
|--------------------------------------|----------|--------|-------|--------|-------|--------|-------|--------|-------|--------|-------|
|                                      |          | Mean   | Trend |
| TS5.1 surface<br>(sampled)           | MEE      | 38.3   | 1.44  | 37.8   | 1.50  | 38.5   | 0.79  | 44.9   | 2.85  | 33.2   | 1.85  |
|                                      | a priori | 43.0   | -0.05 | 47.4   | -0.04 | 43.4   | -1.06 | 45.8   | 0.60  | 35.8   | 0.83  |
|                                      | KF-MEE   | 39.2   | 0.97  | 39.9   | 0.93  | 39.5   | 0.23  | 44.7   | 2.21  | 33.5   | 1.49  |
| TS5.2<br>surface                     | a priori | 42.0   | -0.11 | 46.9   | -0.09 | 42.0   | -1.06 | 44.3   | 0.54  | 34.9   | 0.67  |
|                                      | KF-MEE   | 39.0   | 0.58  | 41.4   | 0.58  | 38.8   | -0.19 | 42.9   | 1.65  | 33.4   | 0.95  |
| TS5.3<br>trop. column<br>(convolved) | OMI      | 41.3   | -0.23 | 49.1   | 0.07  | 41.5   | -0.38 | 37.4   | -0.09 | 36.9   | -0.64 |
|                                      | a priori | 39.7   | 0.03  | 49.5   | 0.01  | 35.9   | -0.10 | 32.7   | 0.18  | 40.3   | -0.36 |
|                                      | KF-OMI   | 41.3   | -0.19 | 49.3   | -0.09 | 40.3   | -0.33 | 36.9   | -0.14 | 38.5   | -0.50 |
| TS5.4<br>trop. Column                | a priori | 40.3   | -0.08 | 49.7   | -0.21 | 35.2   | -0.19 | 34.1   | 0.26  | 42.0   | -0.46 |
|                                      | KF-MEE   | 38.8   | 0.15  | 47.9   | -0.01 | 33.4   | 0.13  | 32.5   | 0.50  | 41.2   | -0.30 |
|                                      | KF-OMI   | 40.6   | -0.25 | 48.6   | -0.32 | 36.7   | -0.35 | 36.2   | -0.05 | 40.8   | -0.61 |

**Table. S5.** Averages (with units ppb or DU) and trends (with units ppb yr<sup>-1</sup> or DU yr<sup>-1</sup>) of surface and tropospheric column O<sub>3</sub> concentrations in 2015-2020 over Southern China (Region #5) from observations (MEE and OMI) and a priori and a posteriori (KF) simulations.
